# Supplementary material for: The bioactivities of resveratrol and its naturally occurring derivatives on skin
Source: PubMed Central journal article supplement — J Food Drug Anal. 2021 Mar 15;29(1):15–38. doi: 10.38212/2224-6614.1151 (PMC9261849; doi:10.38212/2224-6614.1151), 2021-03-15
Supplement: jfda-29-01-015-s001.pdf [file jfda-29-01-015-s001.pdf]

## **Research highlights**

- Resveratrol and its naturally occurring derivatives exert bioactivities on skin.
- We describe the association between resveratrol and its benefits on the skin.
- Topical resveratrol delivery avoids the low oral bioavailability and side effects.
